# Supplementary material for: The construction and analysis of a ferroptosis-related gene prognostic signature for pancreatic cancer
Source: PubMed Central journal article supplement (PMC8064155; doi:10.18632/aging.202801), 2021-04-04
Supplement: aging-13-202801-s001.pdf [file aging-13-202801-s001.pdf]

**SUPPLEMENTARY FIGURES**

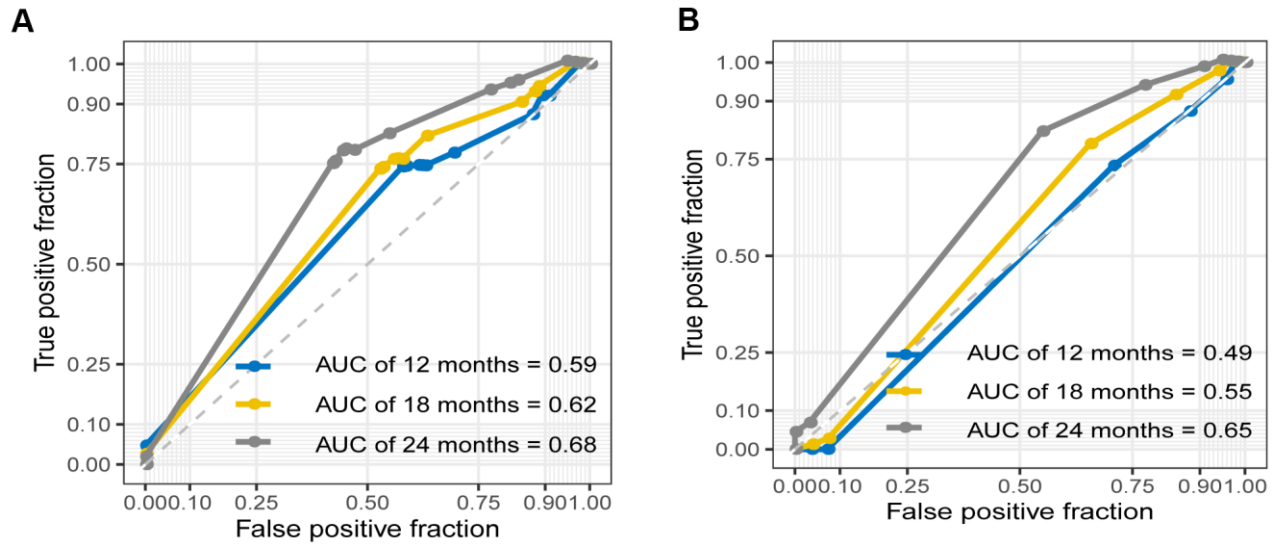

**Supplementary Figure 1.** Time-dependent ROC curves at 12, 18, 24 months for AJCC (A) and TNM (B).

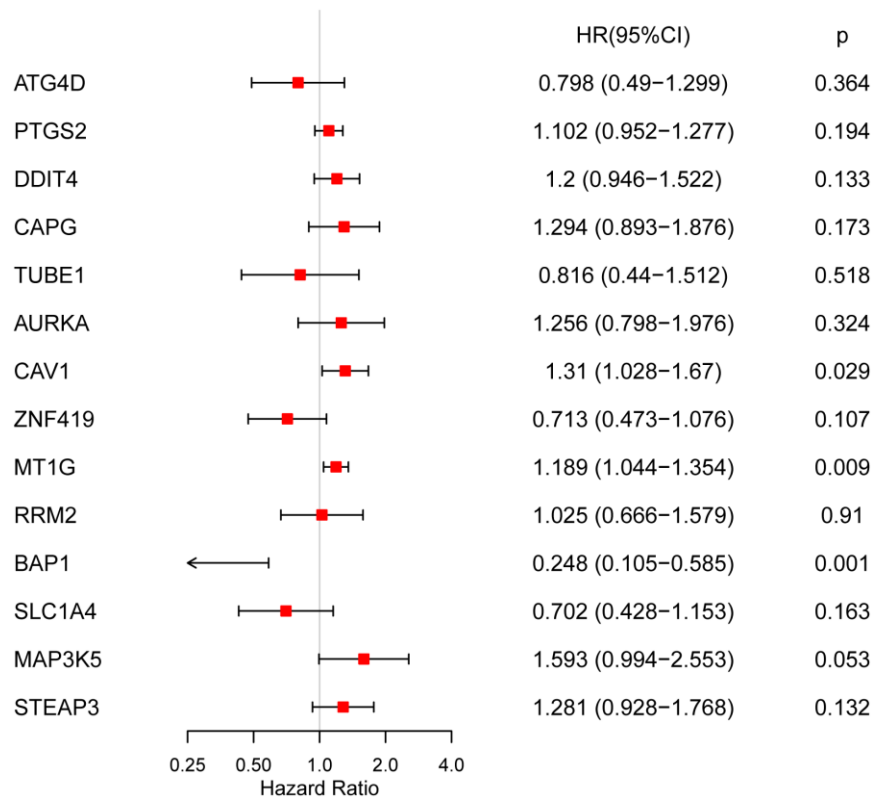

**Supplementary Figure 2.** Forest plot of GRGs associated with the survival of patients.
